# Supplementary material for: Molecular Predictors of 3D Morphogenesis by Breast Cancer Cell Lines in 3D Culture
Source: PLoS Comput Biol. 2010 Feb 26;6(2):e1000684. doi: 10.1371/journal.pcbi.1000684 (PMC2829039; doi:10.1371/journal.pcbi.1000684)
Supplement: Text S1 — This file contains supplementary materials. Section 1 shows how pure thresholding fails in delineating foreground and background. Section 2 provides a summary of Zernike polynomial for representing morphometric traits. Section 3 summarizes background on non-linear regression methods for identifying molecular targets. Section 4 provides comparative analysis with the Gene Set Enrichment Analysis (GSEA). Section 5 outlines the details of validation protocol that includes quantitative image analysis. (0.78 MB PDF) [file pcbi.1000684.s001.pdf]

# Molecular Predictors of 3D Morphogenesis by Breast Cancer Cell Lines in 3D Culture: Supplementary Material

These sections contain supplementary materials. Section 1 shows how pure thresholding fails in delineating foreground and background. Section 2 provides a summary of Zernike polynomial for representing morphometric traits. Section 3 summarizes background on non-linear regression methods for identifying molecular targets. Section 4 provides comparative analysis with the Gene Set Enrichment Analysis (GSEA). Section 5 outlines the details of validation protocol that includes quantitative image analysis.

## 1 Thresholding as a mean for segmentation

Gabor filters eliminate the need for threshold selection and complexities that may arise because of contrast reversal with phase contrast microscopy. Figure 1 shows three examples of thresholding artifacts in our data sets. However, by utilizing Gabor features, these artifacts can be eliminated.

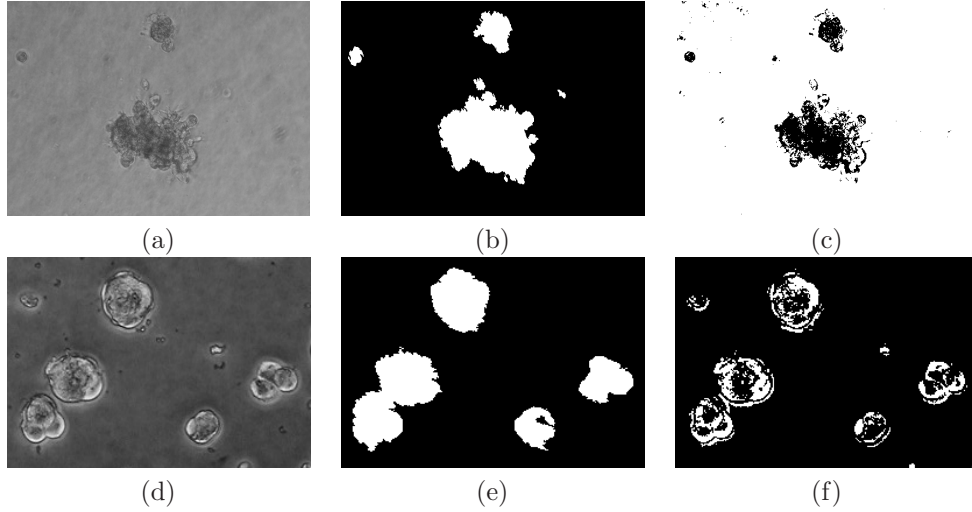

Figure 1: Comparison of thresholding with Gabor filter bank in delineating colonies from background. Clearly, thresholding leaves behind holes and other artifacts.

## 2 Background on Zernike Polynomial

The Zernike polynomials  $V_{mn}(x, y)$  are a set of orthogonal functions that satisfy

$$\int_x \int_y V_{mn}(x, y) V_{kl}(x, y) dx dy = \frac{m+1}{\pi} \delta_{mk} \delta_{nl}, \quad x^2 + y^2 \leq 1, \quad (1)$$

where  $\delta_{mk}$  is 1 if  $m = k$ , and 0 otherwise. Zernike polynomials expressed in polar coordinates  $(\rho, \theta)$  are defined as

$$V_{mn}(\rho, \theta) = R_{mn}(\rho) e^{jn\theta}, \quad (2)$$

where

$$R_{mn}(\rho) = \sum_{k=0}^{\frac{m-|n|}{2}} (-1)^k \frac{(m-k)!}{k! (\frac{m+|n|}{2} - k)! (\frac{m-|n|}{2} - k)!} \rho^{m-2k}. \quad (3)$$

The significance of such a representation is that they provide a translation and rotation invariant measure to encode inherent morphometric properties.

### 3 Molecular predictors of morphological clusters based on non-linear method

In the non-linear case, the .632+ bootstrap error [1] of the SVM rule with Gaussian kernel is used for identifying differentially expressed genes. Bootstrap is a resampling method for model selection and validation that is shown to perform well for small sample sizes by correcting the bias against sample selection. As discussed by Ambroise and McLachlan [1], the .632+ bootstrap error is estimated by

$$E_{B.632+} = (1 - w)E_{resub} + wE_{bs}, \quad (4)$$

where  $E_{resub}$  is the proportion of original cell lines misclassified by the SVM rule  $R$ , constructed from data associated of all cell lines (i.e., the entire data set is used for training);  $E_{bs}$  is the leave-one-out bootstrap error rate for predicting the classification error of a specific cell line, which is not included in the bootstrap samples; and  $w$  is the weight. Suppose that  $K$  bootstrap samples of size  $n$  are obtained by re-sampling with replacement from the original  $N$  cell lines of known cluster labels. The re-sampling scheme is designed in such a way that each bootstrap sample contains the same number of cell lines from each morphological cluster.  $E_{bs}$  in Eq. (4) is then estimated by

$$E_{bs} = \frac{1}{N} \sum_{i=1}^N E_i, \quad (5)$$

where

$$E_i = \frac{\sum_{k=1}^K O_{ik} E_{ik}}{\sum_{k=1}^K O_{ik}}. \quad (6)$$

$O_{ik}$  is 0 if the  $i$ th cell line exists in the  $k$ th bootstrap sample and is 1 otherwise.  $E_{ik} = 1$  if the SVM rule  $R_k$ , formed from the  $k$ th bootstrap sample, misclassifies the  $i$ th cell line, and equals 0 otherwise. The weight  $w$  in Eq. (4) is defined by

$$w = \frac{0.632}{1 - 0.368r} \quad (7)$$

where

$$r = \frac{E_{bs} - E_{resub}}{\gamma - E_{resub}} \quad (8)$$

is the relative overfitting rate and  $\gamma$  is the no-information error rate, which is estimated by

$$\gamma = \sum_{i=1}^c p_i(1 - q_i), \quad (9)$$

where  $c$  is the number of classes or clusters,  $p_i$  is the percentage of the cell lines from the  $i$ th class with respect to the entire population, and  $q_i$  is the correct recognition rate as measured by the SVM rule  $R$ .

The top genes selected to predict the stellate cluster based on .632+ bootstrap error of SVM with Gaussian kernel are listed in Tables 1, with annotations.

### 4 Molecular predictors of morphological clusters based on GSEA

We run GSEA on the gene expression data with the label of stellate vs. round/grape-like. Table 2 shows gene sets (gene ontology terms) enriched in the stellate cluster based on the GSEA results. PPARG appears in 4 of the most enriched gene sets.

Table 1: Best genes for predicting the stellate cluster based on .632+ bootstrap error of SVM with Gaussian kernel ( $E_{B.632+} < 1\%$ ).

| Gene symbol                           | Gene description                                                   | $E_{B.632+}$ | Expression level |
|---------------------------------------|--------------------------------------------------------------------|--------------|------------------|
| PPARG                                 | peroxisome proliferator-activated receptor gamma                   | 0            | +                |
| FADS1///FADS3                         | fatty acid desaturase 1///fatty acid desaturase 3                  | 0            | +                |
| ZEB1                                  | zinc finger E-box binding homeobox 1                               | 0.0013       | +                |
| PVRL3                                 | poliovirus receptor-related 3                                      | 0.0024       | +                |
| AKAP2///PALM2<br>///PALM2-AKAP2       | A kinase (PRKA) anchor protein 2///paralemmin 2///PALM2-AKAP2      | 0.0036       | +                |
| DOCK10                                | dedicator of cytokinesis 10                                        | 0.0037       | +                |
| CLCN6                                 | chloride channel 6                                                 | 0.0043       | +                |
| CTAGE4///LOC100142659<br>///LOC441294 | similar to CTAGE6///CTAGE family, member 4///CTAGE family member   | 0.0047       | -                |
| DAB2                                  | disabled homolog 2, mitogen-responsive phosphoprotein (Drosophila) | 0.0048       | +                |
| FLJ10357                              | hypothetical protein FLJ10357                                      | 0.0063       | +                |
| PALM2-AKAP2                           | PALM2-AKAP2                                                        | 0.0095       | +                |

## 5 Validation

Kenny’s lab has been responsible for validation of PPAR $\gamma$  against the stellate line. Validation against triple negative mammary tissue has been performed by Dr. Baehner, a pathologist. His conclusion is that there is a focal difference in localization of PPAR $\gamma$  between normal and triple negative tissue sections. Nevertheless, we opted to quantify these differences using a recently developed system. In this system, nuclear regions are segmented, and the regions between neighboring nuclei are partitioned through Voronoi tessellation. Next, the brown signal associated with PPAR $\gamma$  is deconvolved from hematoxylin (e.g., nuclear labeling blue signal) through non-negative matrix factorization [2]. Finally, the signals within the nuclear regions are accumulated on a cell-by-cell basis. Intermediate results are shown in Figure 2. Each segmented nuclear reveals a distribution corresponding to PPAR $\gamma$ . These distributions are accumulated for normal and triple negative cells, and results are reported.

## References

1. Ambrose C, McLachlan G (2002) Selection bias in gene extraction on the basis of microarray gene-expression data. *Proc Natl Acad Sci USA* 99: 6562-6566.
2. Rabinovich A, Agarwal S, Laris C, Price J, Belongie S (2003) Unsupervised color decomposition of histologically stained tissue samples. *Arch Pathol Lab Med* .

Table 2: Gene sets (gene ontology terms) enriched in the stellate cluster based on GSEA results.

| GO term                                     | Related genes                                                                                                                                                                                                                                                                                                                                                  | NES    | p-val  | FDR    |
|---------------------------------------------|----------------------------------------------------------------------------------------------------------------------------------------------------------------------------------------------------------------------------------------------------------------------------------------------------------------------------------------------------------------|--------|--------|--------|
| Positive regulation of cell differentiation | ACIN1,ACVR1B,ACVR2A,ADIG,BMP4,BMPR1B,BOC,BTG1,CALCA,ETS1,FOXO3,IGFBP3,IL20,IL7,INHBA,NME2, <b>PPARG</b> ,RUNX1,SART1,SCIN,SOC5,TBX5,TGFB2,VWC2,ZAP70                                                                                                                                                                                                           | 1.8190 | 0      | 0.1928 |
| Contractile fiber                           | ABRA,ACTA1,CDK5R1,DES,DMD,KRT19,MYBPC1,MYL3,MYL5,MYL6B,MYL9,MYLPF,MYOM1,MYOZ2,NEB,SVIL,TNNC1,TNNI3,TNNT2,TPM1,TPM2,TPM3,TPM4,TTN,VCL                                                                                                                                                                                                                           | 1.7450 | 0.0045 | 0.2780 |
| Contractile fiber part                      | ABRA,ACTA1,DES,DMD,KRT19,MYL3,MYL5,MYL6B,MYL9,MYLPF,MYOM1,MYOZ2,NEB,SVIL,TNNC1,TNNI3,TNNT2,TPM1,TPM2,TPM3,TPM4,TTN,VCL                                                                                                                                                                                                                                         | 1.8193 | 0.0032 | 0.2881 |
| Response to extracellular stimulus          | ALB,ASNS,CARTPT,CCKAR,CDKN1A,CDKN2B,CDKN2D,CHMP1A,ENPP1,ENSA,FADS1,GCGR,GHRL,GHSR,GIPR,GNAI2,LEP,NPY,NUAK2,OGT,PCSK9, <b>PPARG</b> ,PPP1R9B,RASGRP4,RPS19,SREBF1,SST,SSTR1,SSTR2,STC1,STC2,TP53,TULP4                                                                                                                                                          | 1.7161 | 0.0154 | 0.3069 |
| Basolateral plasma membrane                 | ACTN1,ACTN2,ACTN3,ATP7A,ATP7B,B4GALT1,BCAR1,BEST1,BSND,C9orf58,CADM1,CLDN19,DLG1,DST,ERBB2IP,EVL,LAYN,LDLRAP1,LIMA1,MET,MUC20,MYO1C,NEXN,NRAP,PTPRC,SLC16A10,SLC4A11,SNIP,SORBS1,SORBS3,STX2,STX4,TJP1,TRIP6,VCL                                                                                                                                               | 1.7547 | 0.0046 | 0.3160 |
| Response to nutrient levels                 | ALB,ASNS,CARTPT,CCKAR,CDKN2B,CDKN2D,CHMP1A,ENPP1,ENSA,FADS1,GCGR,GHRL,GHSR,GIPR,GNAI2,LEP,NPY,NUAK2,OGT,PCSK9, <b>PPARG</b> ,SREBF1,SST,SSTR1,SSTR2,STC1,STC2,TP53,TULP4                                                                                                                                                                                       | 1.8270 | 0      | 0.5209 |
| DNA dependent atpase activity               | BPTF,CHD1,CHD2,CHD3,CHD4,DHX9,ERCC6,ERCC8,G3BP1,PIF1,RAD51,RAD54B,RBBP4,RECQL,RFC3,RUVBL2,SMARCA1,SMARCA11,TOP2A,TTF2,XRCC5,XRCC6                                                                                                                                                                                                                              | 1.5202 | 0.0465 | 0.8447 |
| Positive regulation of response to stimulus | BCAR1,C2,CADM1,CD1D,CD79A,CDH13,CEBPG,CFHR1,CRTAM,CX3CL1,EEF1E1,EREG,FYN,GHRL,GHSR,IFNK,IKBK,IL12A,IL12B,IL29,IL8,KRT1,LAT2,MALT1,MAP3K7,MBL2,NFAM1,NPY,PRKCG,PTPRC,SCG2,SLA2,SLIT2,TGFB2,THY1,TLR8,TNFRSF1A,TRAF2,TRAF6,TRAT1,UBE2N                                                                                                                           | 1.5007 | 0.0175 | 0.8855 |
| Regulation of cell differentiation          | ACIN1,ACVR1B,ACVR2A,ADIG,BMP4,BMPR1B,BOC,BTG1,CALCA,CARTPT,CDK6,CNTN4,DTX1,EREG,ETS1,FOXO3,FOXO4,GPR98,IGFBP3,IL20,IL27,IL4,IL7,INHA,INHBA,IQCB1,LDB1,MAFB,MAP4K1,NANOG,NF1,NLGN1,NME2,NOTCH1,NOTCH2,NOTCH4,NPHP3,PF4, <b>PPARG</b> ,RUNX1,SART1,SCIN,SHH,SNF1LK,SOC5,SPI1,SPINK5,TAF8,TBX3,TBX5,TCFL5,TGFB2,TWIST2,USH2A,VWC2,YWHAG,YWHAH,ZAP70,ZBTB16,ZNF675 | 1.5248 | 0.0101 | 0.9034 |
| Positive regulation of immune response      | BCAR1,C2,CADM1,CD1D,CD79A,CFHR1,CRTAM,EREG,FYN,IFNK,IKBK,IL12A,IL12B,IL29,KRT1,LAT2,MALT1,MAP3K7,MBL2,NFAM1,PTPRC,SLA2,TGFB2,THY1,TLR8,TRAF2,TRAF6,TRAT1,UBE2N                                                                                                                                                                                                 | 1.4725 | 0.0152 | 0.9184 |
| Extracellular matrix structural constituent | ACAN,CHI3L1,COL4A2,COL4A4,COMP,DSPP,EFEMP2,FBLN1,FBLN2,FBN1,FBN2,IMPG1,IMPG2,KAL1,LAMA1,LAMA4,LAMB1,LAMC1,MATN1,MATN3,MEPE,MFAP5,MGP,MUC2,OPTC,PRELP,TFPI2                                                                                                                                                                                                     | 1.5304 | 0.0308 | 0.9642 |

Table 3: Expression of PPAR $\gamma$  in 3D vs. 2D in log2 scale. For differential expression between stellate and round/grape-like cell lines in 3D culture, PPAR $\gamma$  ranks as the top gene with p-value of  $9.13E - 15$  and FDR-adjusted p-value of  $9.54E - 11$ . In 2D culture, PPAR $\gamma$  ranks as the 462-th gene with p-value of 0.0023 and FDR-adjusted p-value of 0.0671.

| Subpopulation | Cell line | 3D      | 2D      |
|---------------|-----------|---------|---------|
| Round         | 600MPE    | 0.3290  | -0.1223 |
|               | BT474     | -0.6718 | -0.6213 |
|               | BT483     | -1.1710 | -0.7686 |
|               | HCC1569   | 0.3118  | 0.0880  |
|               | HCC70     | -0.6482 | -0.3973 |
|               | MCF12A    | -0.5424 | 0.2205  |
|               | MCF7      | -1.1541 | 0.3275  |
|               | MDAMB415  | -0.6063 | -0.2282 |
|               | S1        | -0.8628 | NA      |
|               | T4        | -1.2737 | NA      |
|               | T47D      | -0.9862 | -0.3399 |
| Grape-like    | AU565     | NA      | -0.2708 |
|               | CAMA1     | NA      | -0.4964 |
|               | MDAMB361  | -1.2273 | -0.2731 |
|               | MDAMB453  | -0.9527 | -0.6809 |
|               | MDAMB468  | -0.0010 | 0.3849  |
|               | SKBR3     | -0.1549 | 0.0692  |
|               | UACC812   | 1.0200  | 1.1344  |
|               | ZR751     | -1.0792 | -0.5508 |
|               | ZR75B     | -0.8879 | -0.6201 |
| Stellate      | BT549     | 2.4880  | 0.3240  |
|               | HS578T    | 2.7509  | 0.2887  |
|               | MDAMB231  | 2.4872  | 0.9287  |
|               | MDAMB436  | 2.8415  | 1.6037  |

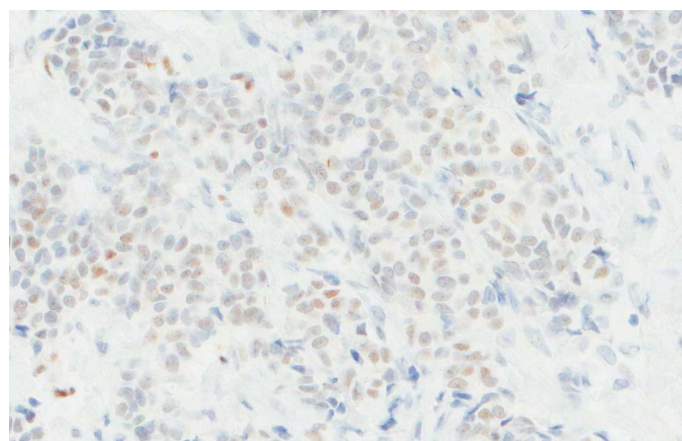

(a)

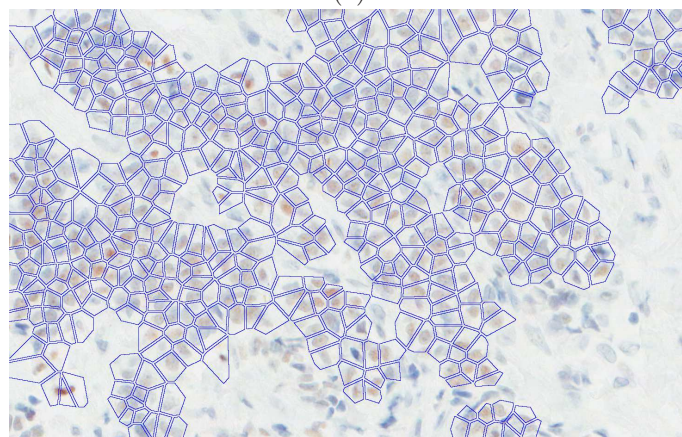

(b)

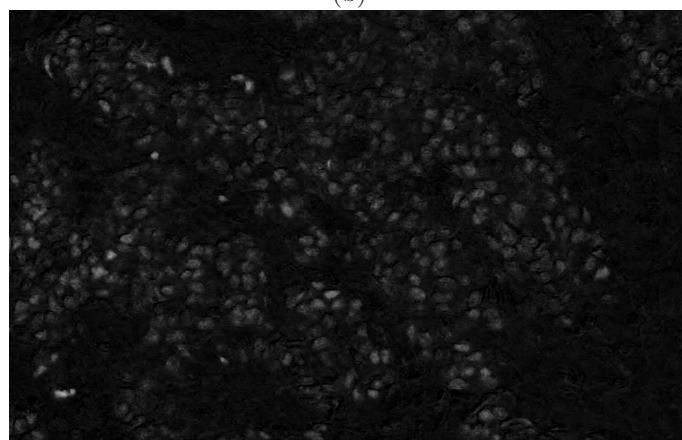

(c)

Figure 2: Quantitative analysis of histological sections: (a) original image; (b) Voronoi tessellation following nuclear segmentation, and (c) non-negative matrix factorization corresponding to PPAR $\gamma$ .
